# Supplementary material for: Context dependent prediction in DNA sequence using neural networks
Source: PeerJ journal article supplement (doi:10.7717/peerj.13666), 2022-09-20
Supplement: PredictDNAwithNeuralNetworks_suppl1_tables_plots_PeerJ_13666_Staff_File_AS.pdf [file PredictDNAwithNeuralNetworks_suppl1_tables_plots_PeerJ_13666_Staff_File_AS.pdf]

# Supplementary I: Context dependent prediction in DNA sequence using neural networks. Tables and additional plots.

Christian Grønbaek, Yuhu Liang, Desmond Elliott, and Anders Krogh

April 16, 2022

## Contents

|                                            |             |
|--------------------------------------------|-------------|
| <b>Human genome</b>                        | <b>SI2</b>  |
| <b>Other genomes</b>                       | <b>SI12</b> |
| Yeast, <i>S.cerevisiae</i> . . . . .       | SI12        |
| Fruit fly, <i>D.melanogaster</i> . . . . . | SI13        |
| Zebrafish, <i>D.rerio</i> . . . . .        | SI15        |
| Mouse . . . . .                            | SI16        |
| <b>Base composition</b>                    | <b>SI16</b> |

## Human genome

| chr/model  | LSTM200 | LSTM50S | LSTM50 | LSTM50P | LSTM200<br>early | mouse<br>LSTM50 |
|------------|---------|---------|--------|---------|------------------|-----------------|
| hg38_chr1  | 0.5299  | 0.5204  | 0.519  | 0.5205  | 0.5087           | 0.4347          |
| hg38_chr2  | 0.5163  | 0.5055  | 0.5056 | 0.5062  | 0.4954           | 0.4278          |
| hg38_chr3  | 0.5224  | 0.5128  | 0.5114 | 0.5118  | 0.4997           | 0.4258          |
| hg38_chr4  | 0.5218  | 0.5107  | 0.5106 | 0.512   | 0.4987           | 0.4245          |
| hg38_chr5  | 0.5267  | 0.5168  | 0.5155 | 0.5173  | 0.5042           | 0.4251          |
| hg38_chr6  | 0.5193  | 0.5088  | 0.509  | 0.5098  | 0.4978           | 0.4272          |
| hg38_chr7  | 0.5347  | 0.5257  | 0.5246 | 0.5243  | 0.5145           | 0.4355          |
| hg38_chr8  | 0.5222  | 0.5097  | 0.5112 | 0.5112  | 0.4998           | 0.4264          |
| hg38_chr9  | 0.5316  | 0.5218  | 0.5205 | 0.5216  | 0.5094           | 0.4327          |
| hg38_chr10 | 0.5272  | 0.5161  | 0.5168 | 0.5167  | 0.5066           | 0.4331          |
| hg38_chr11 | 0.5353  | 0.5252  | 0.5238 | 0.5259  | 0.5127           | 0.4283          |
| hg38_chr12 | 0.5366  | 0.5248  | 0.5258 | 0.5275  | 0.5146           | 0.4341          |
| hg38_chr13 | 0.5161  | 0.5064  | 0.5056 | 0.5037  | 0.4945           | 0.4237          |
| hg38_chr14 | 0.533   | 0.5226  | 0.522  | 0.5253  | 0.5107           | 0.4315          |
| hg38_chr15 | 0.5338  | 0.5262  | 0.5241 | 0.525   | 0.5137           | 0.4351          |
| hg38_chr16 | 0.5496  | 0.539   | 0.5397 | 0.5404  | 0.5305           | 0.4484          |
| hg38_chr17 | 0.5641  | 0.5572  | 0.5556 | 0.5517  | 0.5457           | 0.4557          |
| hg38_chr18 | 0.5356  | 0.519   | 0.5258 | 0.5302  | 0.5148           | 0.4217          |
| hg38_chr19 | 0.6018  | 0.5962  | 0.594  | 0.5982  | 0.5868           | 0.4811          |
| hg38_chr20 | 0.5414  | 0.5286  | 0.5313 | 0.5336  | 0.5208           | 0.4357          |
| hg38_chr21 | 0.5399  | 0.5307  | 0.5297 | 0.522   | 0.5181           | 0.4276          |
| hg38_chr22 | 0.572   | 0.562   | 0.5619 | 0.5672  | 0.5519           | 0.4553          |

Table S11: Accuracy of the predictions of the five models indicated per chromosome in human reference genome GRCh38 (hg38). For LSTM50P the values are obtained on the parts of the chromosomes dedicated for testing the model (see Suppl Methods).

| <b>anno/model</b> | <b>LSTM200</b> | <b>LSTM50S</b> | <b>LSTM50</b> | <b>LSTM50P</b> | <b>LSTM200<br/>early</b> | <b>mouse<br/>LSTM50</b> |
|-------------------|----------------|----------------|---------------|----------------|--------------------------|-------------------------|
| all               | 0.5312         | 0.5209         | 0.5206        | 0.5212         | 0.5098                   | 0.4321                  |
| repeat            | 0.6542         | 0.6375         | 0.637         | na             | 0.615                    | 0.4692                  |
| simple repeat     | 0.8546         | 0.8389         | 0.8508        | na             | 0.8272                   | 0.4968                  |
| 3UTR              | 0.4461         | 0.4401         | 0.4396        | na             | 0.4373                   | 0.412                   |
| 5UTR              | 0.4383         | 0.4319         | 0.4316        | na             | 0.4291                   | 0.4066                  |
| introns           | 0.5195         | 0.51           | 0.5091        | na             | 0.4998                   | 0.4356                  |
| cds               | 0.3896         | 0.3856         | 0.3858        | na             | 0.3873                   | 0.3847                  |
| gene              | 0.5146         | 0.5052         | 0.5044        | na             | 0.4956                   | 0.434                   |
| repeatsGenomeSeq  | 0.7504         | 0.7414         | 0.7409        | na             | 0.7204                   | 0.5389                  |

Table SI2: Accuracy of the predictions of the five models indicated per annotation in human reference genome GRCh38 (hg38). For LSTM50P the values are obtained on the parts of the chromosomes dedicated for testing the model (see Suppl Methods).

| <b>chr</b> | <b>all</b> | <b>repeats</b> | <b>simple repeats</b> | <b>repeats masked</b> | <b>cds</b> | <b>gene</b> | <b>introns</b> | <b>3UTR</b> | <b>5UTR</b> |
|------------|------------|----------------|-----------------------|-----------------------|------------|-------------|----------------|-------------|-------------|
| hg38_chr1  | 0.5299     | 0.6501         | 0.795                 | 0.7497                | 0.3897     | 0.5167      | 0.5218         | 0.4448      | 0.4424      |
| hg38_chr2  | 0.5163     | 0.6375         | 0.764                 | 0.7335                | 0.3793     | 0.5069      | 0.5102         | 0.4431      | 0.4325      |
| hg38_chr3  | 0.5224     | 0.6412         | 0.8349                | 0.7379                | 0.3828     | 0.5094      | 0.5125         | 0.4387      | 0.438       |
| hg38_chr4  | 0.5218     | 0.6361         | 0.8132                | 0.7276                | 0.3727     | 0.513       | 0.5161         | 0.4422      | 0.4314      |
| hg38_chr5  | 0.5267     | 0.6484         | 0.9212                | 0.7426                | 0.3793     | 0.5115      | 0.5149         | 0.4328      | 0.4301      |
| hg38_chr6  | 0.5193     | 0.6407         | 0.7976                | 0.7334                | 0.3849     | 0.5042      | 0.5116         | 0.4426      | 0.4257      |
| hg38_chr7  | 0.5347     | 0.6607         | 0.8424                | 0.7522                | 0.3905     | 0.512       | 0.5184         | 0.438       | 0.4302      |
| hg38_chr8  | 0.5222     | 0.6396         | 0.9364                | 0.7397                | 0.3885     | 0.5056      | 0.5114         | 0.4401      | 0.4328      |
| hg38_chr9  | 0.5316     | 0.6536         | 0.8551                | 0.7517                | 0.3932     | 0.5123      | 0.5197         | 0.4385      | 0.4355      |
| hg38_chr10 | 0.5272     | 0.6541         | 0.9247                | 0.7497                | 0.3822     | 0.5101      | 0.5175         | 0.4401      | 0.4253      |
| hg38_chr11 | 0.5353     | 0.656          | 0.871                 | 0.7598                | 0.3941     | 0.5135      | 0.5184         | 0.4428      | 0.4418      |
| hg38_chr12 | 0.5366     | 0.6587         | 0.8815                | 0.7547                | 0.3849     | 0.5185      | 0.5231         | 0.4526      | 0.4401      |
| hg38_chr13 | 0.5161     | 0.6364         | 0.8393                | 0.7257                | 0.378      | 0.4984      | 0.5041         | 0.4308      | 0.4308      |
| hg38_chr14 | 0.533      | 0.6572         | 0.8555                | 0.7521                | 0.3902     | 0.5157      | 0.5233         | 0.4438      | 0.4355      |
| hg38_chr15 | 0.5338     | 0.6608         | 0.8613                | 0.7606                | 0.3938     | 0.5174      | 0.5252         | 0.4483      | 0.4386      |
| hg38_chr16 | 0.5496     | 0.6802         | 0.8498                | 0.7795                | 0.4069     | 0.533       | 0.5413         | 0.4595      | 0.4537      |
| hg38_chr17 | 0.5641     | 0.7063         | 0.9502                | 0.7956                | 0.3997     | 0.5367      | 0.5443         | 0.4541      | 0.4516      |
| hg38_chr18 | 0.5356     | 0.6686         | 0.9122                | 0.7631                | 0.3746     | 0.4988      | 0.5016         | 0.4398      | 0.4421      |
| hg38_chr19 | 0.6018     | 0.7224         | 0.8437                | 0.8103                | 0.4092     | 0.5717      | 0.5844         | 0.4863      | 0.46        |
| hg38_chr20 | 0.5414     | 0.6607         | 0.9244                | 0.7752                | 0.398      | 0.5129      | 0.5175         | 0.4483      | 0.4511      |
| hg38_chr21 | 0.5399     | 0.6665         | 0.9667                | 0.7568                | 0.3851     | 0.503       | 0.5065         | 0.4416      | 0.437       |
| hg38_chr22 | 0.572      | 0.7035         | 0.8626                | 0.8036                | 0.4057     | 0.5367      | 0.5438         | 0.4726      | 0.4624      |
| All        | 0.5312     | 0.6542         | 0.8546                | 0.7504                | 0.3896     | 0.5146      | 0.5195         | 0.4461      | 0.4383      |

Table SI3: Accuracy of the predictions of LSTM200 per chromosome and annotation in human reference genome GRCh38 (hg38).

| <b>chromo</b> | <b>all</b> | <b>repeats</b> | <b>simple repeats</b> | <b>repeats masked</b> | <b>cds</b> | <b>gene</b> | <b>introns</b> | <b>3UTR</b> | <b>5UTR</b> |
|---------------|------------|----------------|-----------------------|-----------------------|------------|-------------|----------------|-------------|-------------|
| hg38_chr1     | 0.519      | 0.6325         | 0.7811                | 0.7399                | 0.3857     | 0.5063      | 0.5111         | 0.4385      | 0.4359      |
| hg38_chr2     | 0.5056     | 0.6193         | 0.7548                | 0.7231                | 0.3761     | 0.4967      | 0.4999         | 0.4368      | 0.4254      |
| hg38_chr3     | 0.5114     | 0.623          | 0.8337                | 0.7276                | 0.3788     | 0.4987      | 0.5016         | 0.4327      | 0.4306      |
| hg38_chr4     | 0.5106     | 0.6176         | 0.8116                | 0.7169                | 0.3694     | 0.5022      | 0.5051         | 0.4357      | 0.4248      |
| hg38_chr5     | 0.5155     | 0.6299         | 0.9179                | 0.7319                | 0.3763     | 0.5007      | 0.5039         | 0.4265      | 0.4222      |
| hg38_chr6     | 0.509      | 0.6234         | 0.8007                | 0.7236                | 0.382      | 0.4946      | 0.5016         | 0.4358      | 0.4192      |
| hg38_chr7     | 0.5246     | 0.6442         | 0.8353                | 0.7428                | 0.3859     | 0.5026      | 0.5086         | 0.4323      | 0.4246      |
| hg38_chr8     | 0.5112     | 0.6215         | 0.9432                | 0.7299                | 0.3858     | 0.4952      | 0.5007         | 0.4332      | 0.4256      |
| hg38_chr9     | 0.5205     | 0.6355         | 0.8474                | 0.7415                | 0.3896     | 0.5021      | 0.5091         | 0.4323      | 0.4286      |
| hg38_chr10    | 0.5168     | 0.6369         | 0.9299                | 0.7407                | 0.3789     | 0.5003      | 0.5074         | 0.4337      | 0.4194      |
| hg38_chr11    | 0.5238     | 0.6376         | 0.8646                | 0.7498                | 0.3893     | 0.5024      | 0.5071         | 0.4356      | 0.4342      |
| hg38_chr12    | 0.5258     | 0.6415         | 0.8727                | 0.7452                | 0.3817     | 0.5083      | 0.5126         | 0.4454      | 0.4326      |
| hg38_chr13    | 0.5056     | 0.6185         | 0.8353                | 0.7154                | 0.3742     | 0.4885      | 0.4941         | 0.4243      | 0.4235      |
| hg38_chr14    | 0.522      | 0.6394         | 0.8455                | 0.7418                | 0.3864     | 0.5054      | 0.5126         | 0.4371      | 0.4294      |
| hg38_chr15    | 0.5241     | 0.6452         | 0.8676                | 0.753                 | 0.3903     | 0.5075      | 0.5148         | 0.4418      | 0.4326      |
| hg38_chr16    | 0.5397     | 0.6649         | 0.8441                | 0.7723                | 0.403      | 0.524       | 0.5318         | 0.4532      | 0.4475      |
| hg38_chr17    | 0.5556     | 0.6938         | 0.9525                | 0.7899                | 0.3951     | 0.5281      | 0.5354         | 0.4479      | 0.445       |
| hg38_chr18    | 0.5258     | 0.6527         | 0.9112                | 0.7547                | 0.3718     | 0.4888      | 0.4914         | 0.4334      | 0.434       |
| hg38_chr19    | 0.594      | 0.7125         | 0.8387                | 0.805                 | 0.4041     | 0.5637      | 0.5762         | 0.4789      | 0.4541      |
| hg38_chr20    | 0.5313     | 0.6452         | 0.9294                | 0.7678                | 0.3932     | 0.5028      | 0.5072         | 0.4415      | 0.4438      |
| hg38_chr21    | 0.5297     | 0.6502         | 0.9698                | 0.7474                | 0.3814     | 0.4929      | 0.4962         | 0.4357      | 0.4294      |
| hg38_chr22    | 0.5619     | 0.6882         | 0.8503                | 0.7956                | 0.402      | 0.5273      | 0.5341         | 0.4664      | 0.4552      |
| All           | 0.5206     | 0.637          | 0.8508                | 0.7409                | 0.3858     | 0.5044      | 0.5091         | 0.4396      | 0.4316      |

Table SI4: Accuracy of the predictions of LSTM50 per chromosome and annotation in human reference genome GRCh38.

| <b>chromo</b> | <b>all</b> | <b>repeats</b> | <b>simple repeats</b> | <b>repeats masked</b> | <b>cds</b> | <b>gene</b> | <b>introns</b> | <b>3UTR</b> | <b>5UTR</b> |
|---------------|------------|----------------|-----------------------|-----------------------|------------|-------------|----------------|-------------|-------------|
| hg38_chr1     | 0.5087     | 0.6114         | 0.7752                | 0.7207                | 0.3877     | 0.4973      | 0.5016         | 0.4365      | 0.433       |
| hg38_chr2     | 0.4954     | 0.5974         | 0.7464                | 0.7027                | 0.3771     | 0.4878      | 0.4906         | 0.4343      | 0.4227      |
| hg38_chr3     | 0.4997     | 0.5993         | 0.8041                | 0.7049                | 0.3806     | 0.4889      | 0.4915         | 0.4301      | 0.4271      |
| hg38_chr4     | 0.4987     | 0.5937         | 0.7879                | 0.6944                | 0.3701     | 0.4917      | 0.4944         | 0.4319      | 0.4206      |
| hg38_chr5     | 0.5042     | 0.607          | 0.902                 | 0.7107                | 0.3771     | 0.4908      | 0.4937         | 0.4249      | 0.4184      |
| hg38_chr6     | 0.4978     | 0.6            | 0.7692                | 0.7016                | 0.3837     | 0.4859      | 0.4924         | 0.4328      | 0.4167      |
| hg38_chr7     | 0.5145     | 0.6236         | 0.8196                | 0.7239                | 0.3887     | 0.4946      | 0.4998         | 0.4311      | 0.4227      |
| hg38_chr8     | 0.4998     | 0.5986         | 0.8736                | 0.7076                | 0.3865     | 0.4862      | 0.4912         | 0.4303      | 0.4233      |
| hg38_chr9     | 0.5094     | 0.6129         | 0.8271                | 0.7205                | 0.3906     | 0.4937      | 0.4999         | 0.4298      | 0.4271      |
| hg38_chr10    | 0.5066     | 0.6154         | 0.8885                | 0.7208                | 0.3802     | 0.4923      | 0.4987         | 0.4312      | 0.4178      |
| hg38_chr11    | 0.5127     | 0.6152         | 0.8493                | 0.7289                | 0.3911     | 0.4929      | 0.4971         | 0.4334      | 0.4314      |
| hg38_chr12    | 0.5146     | 0.6194         | 0.8436                | 0.7247                | 0.3835     | 0.4991      | 0.503          | 0.4421      | 0.4305      |
| hg38_chr13    | 0.4945     | 0.5951         | 0.8085                | 0.6938                | 0.376      | 0.4797      | 0.4848         | 0.4211      | 0.4195      |
| hg38_chr14    | 0.5107     | 0.6163         | 0.8173                | 0.7198                | 0.388      | 0.4962      | 0.5027         | 0.4347      | 0.4273      |
| hg38_chr15    | 0.5137     | 0.6239         | 0.8352                | 0.7326                | 0.3907     | 0.4991      | 0.5058         | 0.4383      | 0.429       |
| hg38_chr16    | 0.5305     | 0.6462         | 0.828                 | 0.7563                | 0.4044     | 0.517       | 0.524          | 0.4518      | 0.4458      |
| hg38_chr17    | 0.5457     | 0.673          | 0.8985                | 0.7705                | 0.397      | 0.5217      | 0.5286         | 0.4472      | 0.4437      |
| hg38_chr18    | 0.5148     | 0.6302         | 0.8845                | 0.7331                | 0.3724     | 0.4803      | 0.4827         | 0.4312      | 0.4304      |
| hg38_chr19    | 0.5868     | 0.6987         | 0.8281                | 0.7927                | 0.4061     | 0.5583      | 0.5702         | 0.4766      | 0.4522      |
| hg38_chr20    | 0.5208     | 0.6246         | 0.8945                | 0.7477                | 0.395      | 0.4951      | 0.499          | 0.4402      | 0.441       |
| hg38_chr21    | 0.5181     | 0.6266         | 0.9228                | 0.7245                | 0.382      | 0.4845      | 0.4875         | 0.4333      | 0.4264      |
| hg38_chr22    | 0.5519     | 0.6681         | 0.823                 | 0.7765                | 0.4026     | 0.5204      | 0.5268         | 0.4641      | 0.453       |
| All           | 0.5098     | 0.615          | 0.8272                | 0.7204                | 0.3873     | 0.4956      | 0.4998         | 0.4373      | 0.4291      |

Table SI5: Accuracy of the predictions of LSTM200early per chromosome and annotation in human reference genome GRCh38.

| <b>chromo</b> | <b>all</b> | <b>repeats</b> | <b>simple repeats</b> | <b>repeats masked</b> | <b>cds</b> | <b>gene</b> | <b>introns</b> | <b>3UTR</b> | <b>5UTR</b> |
|---------------|------------|----------------|-----------------------|-----------------------|------------|-------------|----------------|-------------|-------------|
| hg38_chr1     | 0.4347     | 0.4742         | 0.5314                | 0.5474                | 0.3849     | 0.4348      | 0.4366         | 0.4122      | 0.4098      |
| hg38_chr2     | 0.4278     | 0.4653         | 0.4544                | 0.5388                | 0.3749     | 0.4286      | 0.4298         | 0.4088      | 0.402       |
| hg38_chr3     | 0.4258     | 0.4598         | 0.5285                | 0.531                 | 0.3785     | 0.4262      | 0.4271         | 0.4073      | 0.4035      |
| hg38_chr4     | 0.4245     | 0.454          | 0.5513                | 0.5241                | 0.3692     | 0.4257      | 0.4267         | 0.4065      | 0.3971      |
| hg38_chr5     | 0.4251     | 0.4575         | 0.3977                | 0.5259                | 0.375      | 0.4263      | 0.4274         | 0.4052      | 0.3971      |
| hg38_chr6     | 0.4272     | 0.4634         | 0.5607                | 0.5345                | 0.3794     | 0.4274      | 0.43           | 0.407       | 0.3974      |
| hg38_chr7     | 0.4355     | 0.4755         | 0.5101                | 0.5429                | 0.3847     | 0.4352      | 0.4368         | 0.4098      | 0.404       |
| hg38_chr8     | 0.4264     | 0.4597         | 0.3849                | 0.5322                | 0.3835     | 0.4274      | 0.4289         | 0.406       | 0.4019      |
| hg38_chr9     | 0.4327     | 0.4696         | 0.5226                | 0.5405                | 0.3885     | 0.4348      | 0.4367         | 0.4085      | 0.4066      |
| hg38_chr10    | 0.4331     | 0.4743         | 0.3858                | 0.5453                | 0.3776     | 0.4341      | 0.4369         | 0.4081      | 0.3997      |
| hg38_chr11    | 0.4283     | 0.4602         | 0.4809                | 0.5292                | 0.3883     | 0.4299      | 0.4315         | 0.4093      | 0.4082      |
| hg38_chr12    | 0.4341     | 0.472          | 0.4058                | 0.5422                | 0.3802     | 0.4359      | 0.4376         | 0.4113      | 0.4056      |
| hg38_chr13    | 0.4237     | 0.4555         | 0.4924                | 0.5253                | 0.3728     | 0.425       | 0.4271         | 0.4006      | 0.3979      |
| hg38_chr14    | 0.4315     | 0.468          | 0.4977                | 0.5361                | 0.3844     | 0.4328      | 0.4355         | 0.4085      | 0.4058      |
| hg38_chr15    | 0.4351     | 0.4764         | 0.4908                | 0.5467                | 0.3888     | 0.4378      | 0.4403         | 0.4118      | 0.4055      |
| hg38_chr16    | 0.4484     | 0.4977         | 0.5183                | 0.5683                | 0.3997     | 0.4543      | 0.457          | 0.4247      | 0.4203      |
| hg38_chr17    | 0.4557     | 0.5075         | 0.3953                | 0.5702                | 0.3942     | 0.4583      | 0.4617         | 0.4206      | 0.4203      |
| hg38_chr18    | 0.4217     | 0.4514         | 0.4263                | 0.5117                | 0.372      | 0.4255      | 0.4265         | 0.4072      | 0.4037      |
| hg38_chr19    | 0.4811     | 0.5286         | 0.5106                | 0.5875                | 0.4053     | 0.4839      | 0.4903         | 0.439       | 0.4259      |
| hg38_chr20    | 0.4357     | 0.4717         | 0.3914                | 0.5437                | 0.3918     | 0.439       | 0.4407         | 0.4163      | 0.4125      |
| hg38_chr21    | 0.4276     | 0.4564         | 0.3638                | 0.5163                | 0.38       | 0.4306      | 0.432          | 0.4101      | 0.4043      |
| hg38_chr22    | 0.4553     | 0.4968         | 0.469                 | 0.5587                | 0.3998     | 0.4591      | 0.4622         | 0.4327      | 0.4237      |
| All           | 0.4321     | 0.4692         | 0.4968                | 0.5389                | 0.3847     | 0.434       | 0.4356         | 0.412       | 0.4066      |

Table SI6: Accuracy of the predictions of mouseLSTM50 per chromosome and annotation in human reference genome GRCh38.

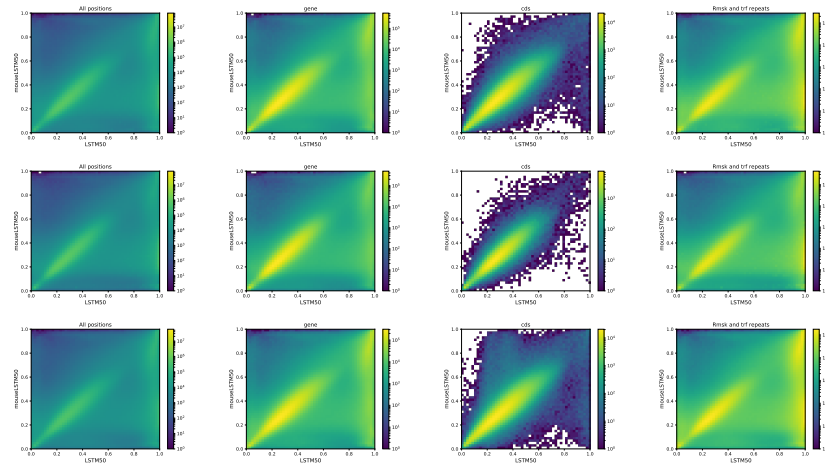

Figure S11: LSTM50 vs mouseLSTM50. Density-plot of probabilities of reference bases in annotated parts of chromosomes of the human reference genome GRCh38 according to LSTM50 (x-axis) and mouseLSTM50 (y-axis). From the top: chromosome 17, 18, 19. Annotations from left to right: all positions, gene, cds, repeats.

| Model1  | Model2      | Test value | p-value      |
|---------|-------------|------------|--------------|
| LSTM200 | k=3 central | 1877.6     | $< 10^{-20}$ |
| LSTM200 | k=4 central | 1646.4     | $< 10^{-20}$ |
| LSTM200 | k=5 central | 1339.9     | $< 10^{-20}$ |
| LSTM200 | Markov k=14 | 768.6      | $< 10^{-20}$ |

Table S17: Results of likelihood ratio tests. Model2 was used as base (“denominator”) in likelihood ratio test.



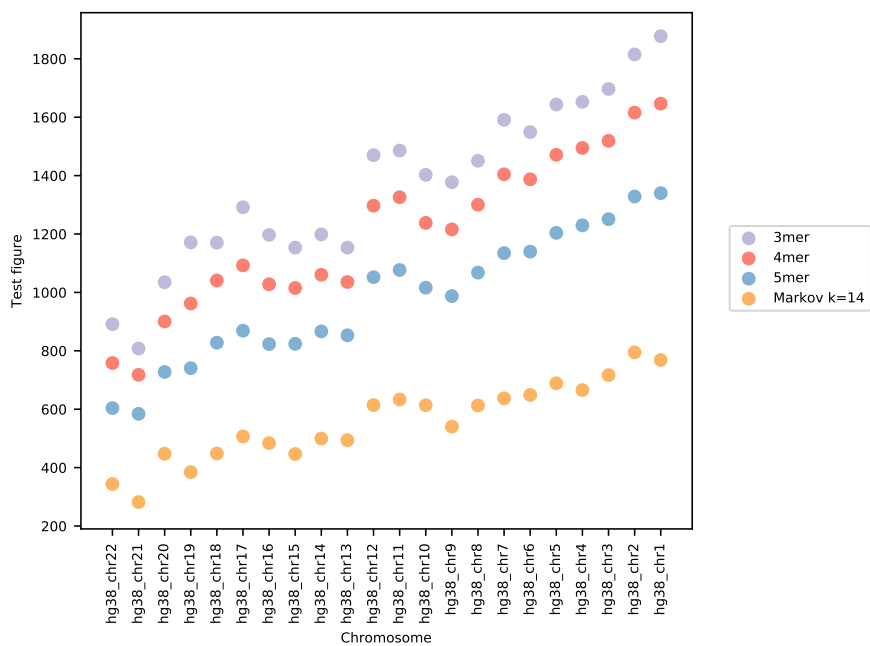

Figure SI2: Likelihood ratio test figures per chromosome for LSTM200 vs simpler models as indicated. Test values increase with the size of the sample size (equivalently the chromosome size) supporting the rejection of the null hypotheses of equally performing models [? ].

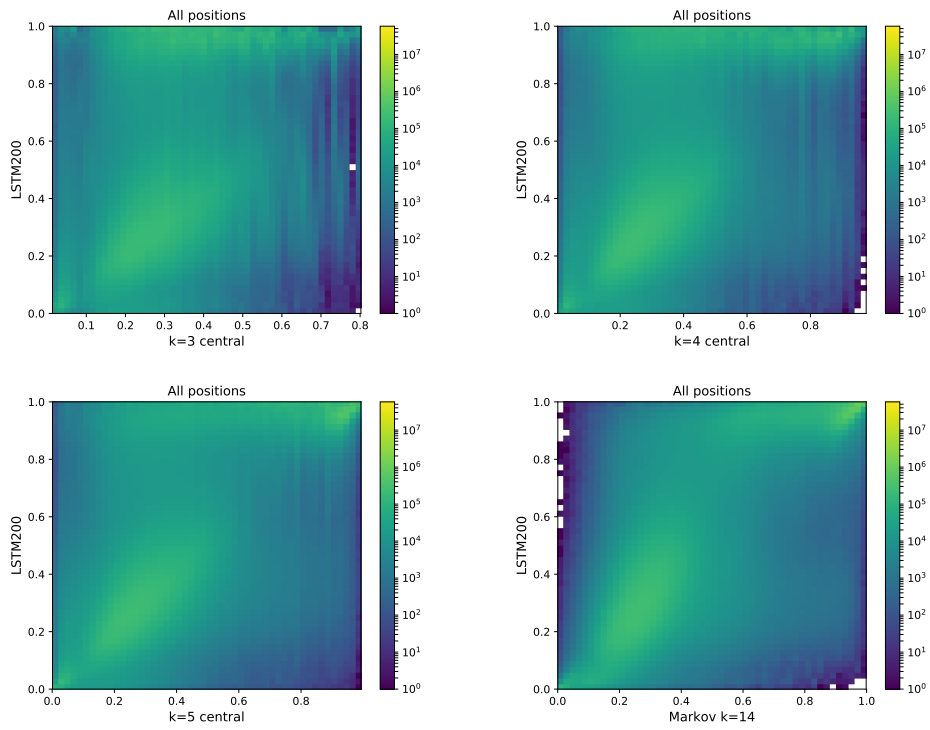

Figure SI3: LSTM200 (x-axis) vs simpler models (y-axis) on human hg38, chromosome 19. From left to right: central model for  $k=3,4,5$  and Markov model,  $k=14$ . Each plot shows the density of the reference-base probabilities on chromosome 19 according to the named models. Please note that colors are not shared between the plots.

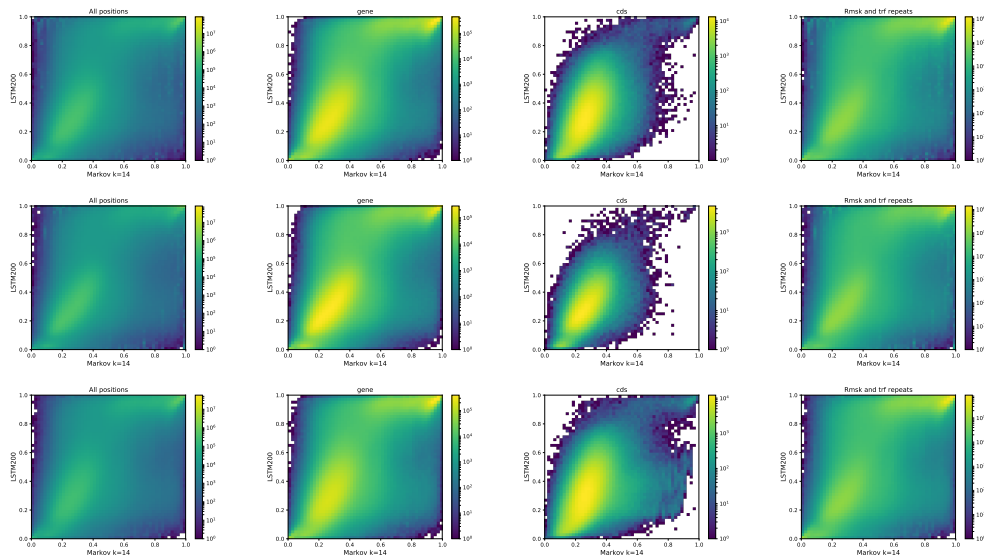

Figure SI4: Markov k=14 vs. LSTM200. Density-plot of probabilities of reference bases in annotated parts of chromosomes of the human reference genome GRCh38 according to the Markov k=14 model(x-axis) and LSTM200 (y-axis). From the top: chromosome 17, 18, 19. Annotations from left to right: all positions, gene, cds, repeats.

## Other genomes

### Yeast, *S.cerevisiae*

| <b>chr/annotation</b> | <b>all</b> | <b>simple repeats</b> | <b>chr/annotation</b> | <b>all</b> | <b>simple repeats</b> |
|-----------------------|------------|-----------------------|-----------------------|------------|-----------------------|
| R64_chr1              | 0.369      | 0.4239                | R64_chr1              | 0.4221     | 0.6612                |
| R64_chr2              | 0.372      | 0.4599                | R64_chr2              | 0.416      | 0.6167                |
| R64_chr3              | 0.3719     | 0.4591                | R64_chr3              | 0.4152     | 0.6394                |
| R64_chr4              | 0.3744     | na                    | R64_chr4              | 0.4209     | na                    |
| R64_chr5              | 0.3681     | na                    | R64_chr5              | 0.4169     | na                    |
| R64_chr6              | 0.3705     | na                    | R64_chr6              | 0.4194     | na                    |
| R64_chr7              | 0.3728     | na                    | R64_chr7              | 0.4191     | na                    |
| R64_chr8              | 0.3704     | na                    | R64_chr8              | 0.4077     | na                    |
| R64_chr9              | 0.3707     | na                    | R64_chr9              | 0.4101     | na                    |
| R64_chr10             | 0.3705     | na                    | R64_chr10             | 0.4152     | na                    |
| R64_chr11             | 0.3731     | na                    | R64_chr11             | 0.4081     | na                    |
| R64_chr12             | 0.3704     | na                    | R64_chr12             | 0.4201     | na                    |
| R64_chr13             | 0.3733     | na                    | R64_chr13             | 0.4192     | na                    |
| R64_chr14             | 0.3693     | na                    | R64_chr14             | 0.4133     | na                    |
| R64_chr15             | 0.372      | na                    | R64_chr15             | 0.4135     | na                    |
| R64_chr16             | 0.3721     | na                    | R64_chr16             | 0.4192     | na                    |
| All                   | 0.3718     | 0.4476                | All                   | 0.4166     | 0.6373                |

Table SI8: Accuracy of the predictions of LSTM50early (left) and LSTM50 (right) on yeast genome R64. LSTM50early is identical to LSTM50, but less trained (see Suppl. methods).

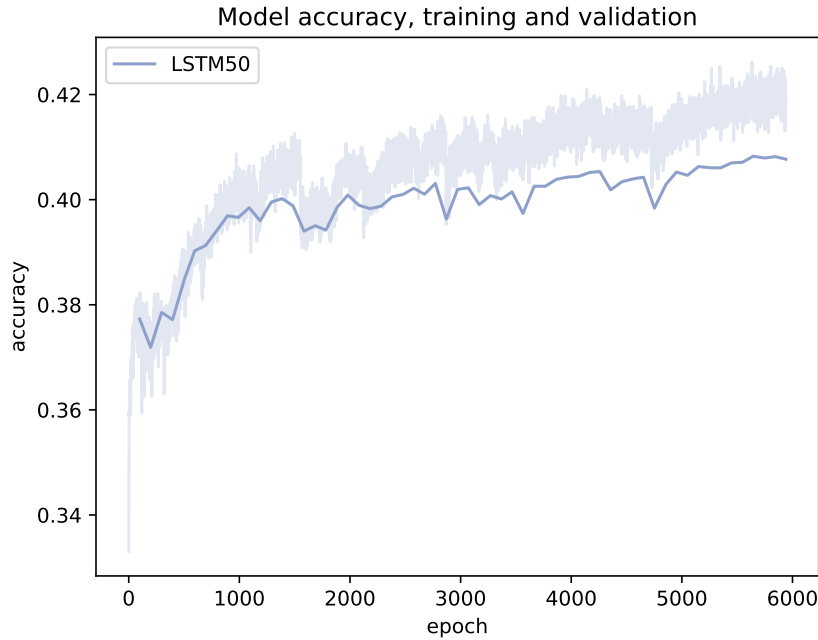

Figure SI5: LSTM50 on yeast. Accuracy during training (dimmed) with validations (solid line). Clear overfitting is seen.

### Fruit fly, *D.melanogaster*

| <b>chr/annotation</b> | <b>all</b> | <b>chr/annotation</b> | <b>all</b> |
|-----------------------|------------|-----------------------|------------|
| r6.18_chrX            | 0.4359     | r6.18_chrX            | 0.466      |
| r6.18_chr2L           | 0.4146     | r6.18_chr2L           | 0.4425     |
| r6.18_chr2R           | 0.4105     | r6.18_chr2R           | 0.4602     |
| r6.18_chr3L           | 0.4165     | r6.18_chr3L           | 0.4604     |
| r6.18_chr3R           | 0.4183     | r6.18_chr3R           | 0.4552     |
| r6.18_chr4            | 0.4157     | r6.18_chr4            | 0.4443     |
| All                   | 0.4188     | All                   | 0.4568     |

Table SI9: Accuracy of the predictions of LSTM50early (left) and LSTM50 (right) on fruit fly genome dm6 (r6.18). LSTM50early is identical to LSTM50, but less trained (see Suppl. methods)

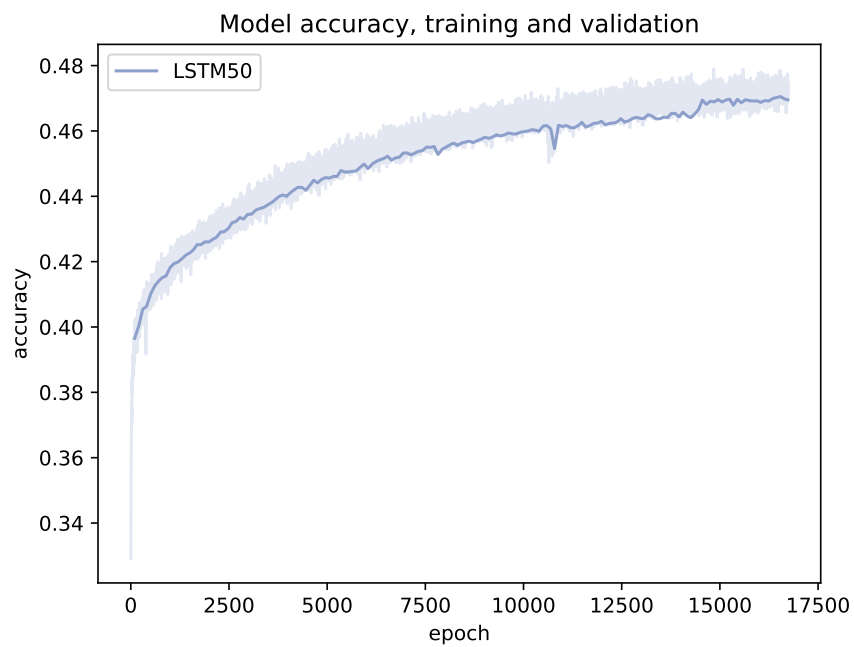

Figure SI6: LSTM50 on fruit fly. Accuracy during training (dimmed) with validations (solid line). Mild overfitting is seen.

## Zebrafish, D.rerio

| chr/annotation | all    | repeats masked |
|----------------|--------|----------------|
| GRCz11_chr1    | 0.5377 | 0.7019         |
| GRCz11_chr2    | 0.5463 | 0.7067         |
| GRCz11_chr3    | 0.5387 | 0.7004         |
| GRCz11_chr4    | 0.5212 | 0.6504         |
| GRCz11_chr5    | 0.5448 | 0.7043         |
| GRCz11_chr6    | 0.5448 | 0.704          |
| GRCz11_chr7    | 0.54   | 0.7066         |
| GRCz11_chr8    | 0.5454 | 0.7048         |
| GRCz11_chr9    | 0.5419 | 0.7053         |
| GRCz11_chr10   | 0.5471 | 0.7088         |
| GRCz11_chr11   | 0.5443 | 0.7054         |
| GRCz11_chr12   | 0.5454 | 0.7066         |
| GRCz11_chr13   | 0.5464 | 0.7098         |
| GRCz11_chr14   | 0.5427 | 0.7062         |
| GRCz11_chr15   | 0.5452 | 0.7052         |
| GRCz11_chr16   | 0.5483 | 0.7081         |
| GRCz11_chr17   | 0.5471 | 0.7098         |
| GRCz11_chr18   | 0.5448 | 0.7075         |
| GRCz11_chr19   | 0.5426 | 0.704          |
| GRCz11_chr20   | 0.5458 | 0.7052         |
| GRCz11_chr21   | 0.5459 | 0.7051         |
| GRCz11_chr22   | 0.5366 | 0.6993         |
| GRCz11_chr23   | 0.5455 | 0.7079         |
| GRCz11_chr24   | 0.545  | 0.7085         |
| GRCz11_chr25   | 0.5478 | 0.7089         |
| All            | 0.5428 | 0.7024         |

Table SI10: Accuracy of the predictions of LSTM50 on zebrafish genome GRCz11.

## Mouse

| <b>chr/annotation</b> | <b>all</b> | <b>repeats<br/>masked</b> |
|-----------------------|------------|---------------------------|
| m38_chr1              | 0.5136     | 0.6684                    |
| m38_chr2              | 0.5034     | 0.6643                    |
| m38_chr3              | 0.5188     | 0.6751                    |
| m38_chr4              | 0.5157     | 0.6664                    |
| m38_chr5              | 0.5105     | 0.6688                    |
| m38_chr6              | 0.51       | 0.6662                    |
| m38_chr7              | 0.5179     | 0.6653                    |
| m38_chr8              | 0.5036     | 0.6653                    |
| m38_chr9              | 0.5024     | 0.6573                    |
| m38_chr10             | 0.5085     | 0.6661                    |
| m38_chr11             | 0.4984     | 0.6588                    |
| m38_chr12             | 0.5059     | 0.6618                    |
| m38_chr13             | 0.5034     | 0.6573                    |
| m38_chr14             | 0.5077     | 0.6664                    |
| m38_chr15             | 0.5042     | 0.6618                    |
| m38_chr16             | 0.5043     | 0.6607                    |
| m38_chr17             | 0.5089     | 0.6617                    |
| m38_chr18             | 0.5026     | 0.6603                    |
| m38_chr19             | 0.4951     | 0.6526                    |
| All                   | 0.5081     | 0.6644                    |

Table SI11: Accuracy of the predictions of mouseLSTM50 on mouse reference genome GRCm38 (mm10).

## Base composition



| <b>Species</b>             | <b>A</b> | <b>C</b> | <b>G</b> | <b>T</b> | <b>Random guess acc</b> |
|----------------------------|----------|----------|----------|----------|-------------------------|
| human (H.sapiens)          | 0.2952   | 0.2039   | 0.2048   | 0.2961   | 0.2583                  |
| yeast (S.cerevisae)        | 0.3098   | 0.1909   | 0.1906   | 0.3087   | 0.2640                  |
| fruit fly (D.melanogaster) | 0.2900   | 0.2101   | 0.2099   | 0.2899   | 0.2564                  |
| mouse (M.musculus)         | 0.2915   | 0.2083   | 0.2083   | 0.291    | 0.2569                  |
| zebrafish (D.rerio)        | 0.3171   | 0.1830   | 0.1830   | 0.3169   | 0.2680                  |

Table SI12: Frequency of the occurrence of each of the four bases for the species we have considered. The last row shows the accuracy level of predicting the base at a given position when applying a random guess adhering to the frequencies.
