# Supplementary material for: Context dependent prediction in DNA sequence using neural networks
Source: PeerJ journal article supplement (doi:10.7717/peerj.13666), 2022-09-20
Supplement: PredictDNAwithNeuralNetworks_suppl2e_human.pdf [file PredictDNAwithNeuralNetworks_suppl2e_human.pdf]

# Supplementary Iie: Context dependent prediction in DNA sequence using neural networks. Fouriers, human genome, Markov and $k = 5$ central model (chr22); mouseLSTM50 (chr20).

Christian Grønbaek, Yuhu Liang, Desmond Elliott, and Anders Krogh

April 17, 2022

## Fouriers plots, predictions on chromosome 22

### Markov model

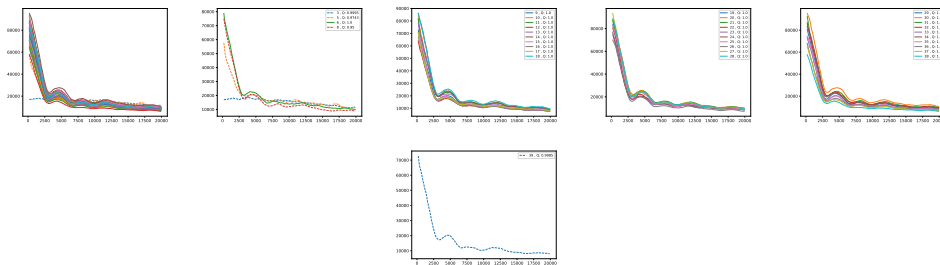

Figure SB1: Markov model,  $k=14$ . Fouriers on reference-base probability for chromosome: hg38\_chr22. The genome string is divided in adjacent segments of 1Mb; several adjacent segments are covered in each plot, segment numbers are indicated in the legend. First plot (upper left) shows the results for all segments in this chromosome.

## $k = 5$ central model

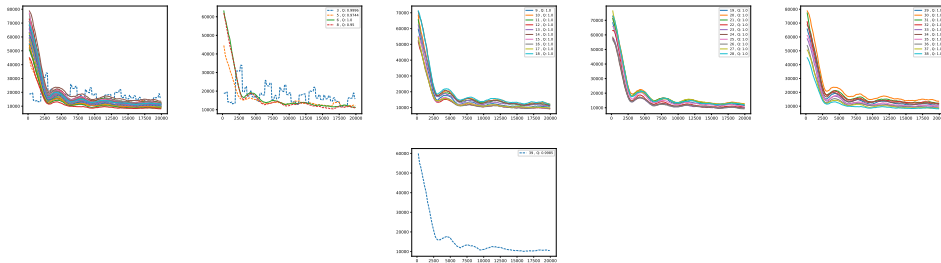

Figure SB2: 5-mer model. Fouriers on reference-base probability for chromosome: hg38\_chr22. The genome string is divided in adjacent segments of 1Mb; several adjacent segments are covered in each plot, segment numbers are indicated in the legend. First plot (upper left) shows the results for all segments in this chromosome.

## LSTM200

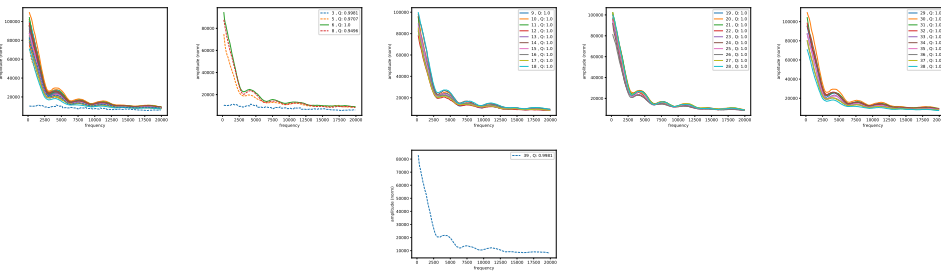

Figure SB3: LSTM200. Fouriers on reference-base probability for chromosome: hg38\_chr22. The genome string is divided in adjacent segments of 1Mb; several adjacent segments are covered in each plot, segment numbers are indicated in the legend. First plot (upper left) shows the results for all segments in this chromosome.
